# Supplementary material for: A general approach for postmortem interval based on uniformly distributed and interconnected qualitative indicators
Source: Springer Nature journal article supplement (doi:10.1007/s00414-016-1520-3), 2017-01-04
Supplement: MOESM2 [file 11977208]

## SUPPLEMENTARY TABLES FOR

“A general approach for postmortem interval based on uniformly distributed and interconnected qualitative indicators”

International Journal of Legal Medicine

Szymon Matuszewski

Laboratory of Criminalistics, Adam Mickiewicz University, Św. Marcin 90, 61-809 Poznań, Poland

[szymmat@amu.edu.pl](mailto:szymmat@amu.edu.pl).

### Content

Table 1. Definitive insect species for the rural habitats of Central Europe

Table 2. Temperature models for the pre-appearance interval (PAI) of developmental stages included in the analyses

Table 3. Average monthly pre-appearance interval (days) of the selected life stages of *Lucilia caesar*

Table 1. Definitive insect species for the rural (open and forest) habitats of Central Europe

| Order                                     | Family        | Species                                                   |
|-------------------------------------------|---------------|-----------------------------------------------------------|
| Diptera                                   | Calliphoridae | <i>Calliphora vomitoria</i> Linnaeus, 1758                |
|                                           |               | <i>Calliphora vicina</i> Robineau-Desvoidy 1830           |
|                                           |               | <i>Lucilia caesar</i> (Linnaeus, 1758)                    |
|                                           |               | <i>Lucilia sericata</i> (Meigen, 1826)                    |
|                                           |               | <i>Phormia regina</i> (Meigen, 1826)                      |
|                                           |               | <i>Protophormia terraenovae</i> (Robineau-Desvoidy, 1830) |
|                                           | Fanniidae     | <i>Fannia canicularis</i> (Linnaeus, 1761)                |
|                                           |               | <i>Fannia manicata</i> (Meigen, 1826)                     |
|                                           |               | <i>Fannia leucosticta</i> (Meigen, 1838)                  |
|                                           | Muscidae      | <i>Hydrotaea dentipes</i> (Fabricius, 1805)               |
|                                           |               | <i>Hydrotaea ignava</i> (Harris, 1780)                    |
|                                           |               | <i>Hydrotaea pilipes</i> Stein, 1903                      |
|                                           |               | <i>Hydrotaea similis</i> Meade, 1887                      |
|                                           | Piophilidae   | <i>Stearibia nigriceps</i> (Meigen, 1826)                 |
|                                           | Sarcophagidae | <i>Sarcophaga caerulescens</i> (Zetterstedt, 1838)        |
|                                           |               | <i>Sarcophaga similis</i> Meade, 1876                     |
|                                           | Coleoptera    | Cleridae                                                  |
| <i>Necrobia violacea</i> (Linnaeus, 1758) |               |                                                           |
| Dermestidae                               |               | <i>Dermestes frischii</i> Kugelann, 1792                  |
|                                           |               | <i>Dermestes undulatus</i> Brahm 1790                     |
| Histeridae                                |               | <i>Margarinotus brunneus</i> (Fabricius, 1775)            |
|                                           |               | <i>Saprinus semistriatus</i> (Scriba, 1790)               |
| Nitidulidae                               |               | <i>Omosita colon</i> (Linnaeus, 1758)                     |
| Silphidae                                 |               | <i>Necrodes littoralis</i> (Linnaeus, 1758)               |
|                                           |               | <i>Oiceoptoma thoracicum</i> Linnaeus 1758                |
|                                           |               | <i>Thanatophilus rugosus</i> (Linnaeus, 1758)             |
|                                           |               | <i>Thanatophilus sinuatus</i> (Fabricius, 1775)           |
| Staphylinidae                             |               | <i>Creophilus maxillosus</i> (Linnaeus, 1758)             |
|                                           |               | <i>Omalium rivulare</i> (Paykull, 1789)                   |
| Hymenoptera                               | Pteromalidae  | <i>Nasonia vitripennis</i> (Walker, 1836)                 |

Table 2. Temperature models for the pre-appearance interval (PAI) of developmental stages included in the analyses

| Species                       | Stage               | Model*                                                                    | $r^2$ |
|-------------------------------|---------------------|---------------------------------------------------------------------------|-------|
| <i>Lucilia caesar</i>         | Eggs                | PAI = $(-0.114238) + e^{[(10.2233)+(-0.604897)\times\text{Temperature}]}$ | 0.38  |
|                               | 1st instar larvae   | PAI = $(2.03038) + e^{[(91.2821)+(-6.72235)\times\text{Temperature}]}$    | 0.49  |
|                               | 2nd instar larvae   | PAI = $(2.11191) + e^{[(10.3004)+(-0.617561)\times\text{Temperature}]}$   | 0.61  |
|                               | 3rd instar larvae   | PAI = $(3.12195) + e^{[(8.7601)+(-0.476809)\times\text{Temperature}]}$    | 0.78  |
|                               | Post-feeding larvae | PAI = $(5.83693) + e^{[(8.97272)+(-0.476234)\times\text{Temperature}]}$   | 0.80  |
| <i>Thanatophilus sinuatus</i> | 1st instar larvae   | PAI = $(5.09098) + e^{[(5.76744)+(-0.23)\times\text{Temperature}]}$       | 0.71  |
|                               | 2nd instar larvae   | PAI = $(8.81507) + e^{[(6.89735)+(-0.30304)\times\text{Temperature}]}$    | 0.73  |
|                               | 3rd instar larvae   | PAI = $(9.70135) + e^{[(6.8821)+(-0.27611)\times\text{Temperature}]}$     | 0.79  |
| <i>Necrodes littoralis</i>    | 1st instar larvae   | PAI = $(10.3811) + e^{[(8.9028)+(-0.43531)\times\text{Temperature}]}$     | 0.86  |
|                               | 2nd instar larvae   | PAI = $(11.5608) + e^{[(8.18248)+(-0.36313)\times\text{Temperature}]}$    | 0.87  |
|                               | 3rd instar larvae   | PAI = $(12.3114) + e^{[(8.0968)+(-0.33734)\times\text{Temperature}]}$     | 0.85  |

\* PAI =  $c + e^{(b_0+b_1\times\text{Temperature})}$ , Temperature – ground level temperature averaged for the duration of PAI

Table 3. Average monthly pre-appearance interval (days) of the selected life stages of *Lucilia caesar*

| Stage             | Month |     |     |      |     |
|-------------------|-------|-----|-----|------|-----|
|                   | IV    | VI  | VII | VIII | IX  |
| Eggs              | 11.6  | 0.2 | 0.3 | 0.3  | 0.3 |
| 1st instar larvae | 14.3  | 1.0 | 1.2 | 0.8  | 2.2 |
